# Supplementary material
Source: Springer Nature journal article supplement (https://www.springermedizin.de/resource/supplementary/12936_2011_2171_MOESM6_ESM.pdf/9542512)

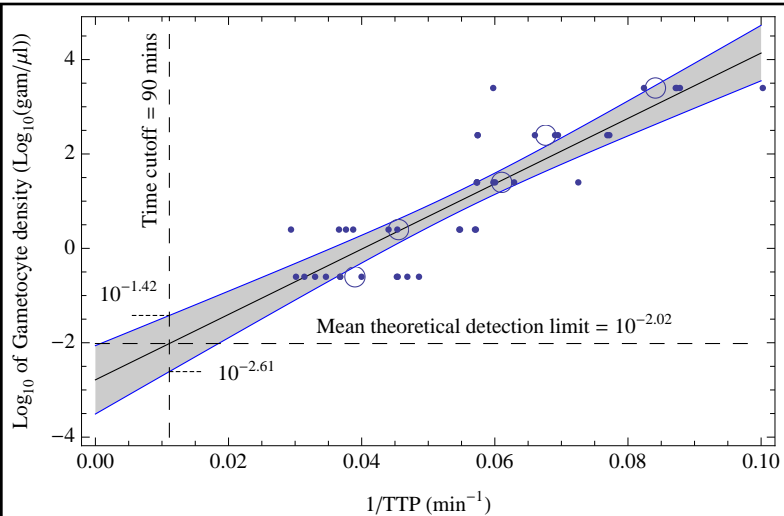

Supplement: MOESM6 [file 9542512]
